# Supplementary material for: Two Decades of Wildlife Pathogen Surveillance: Case Study of Choclo orthohantavirus and Its Wild Reservoir Oligoryzomys costaricensis
Source: MDPI journal article supplement (doi:10.3390/v15061390), 2023-06-17
Supplement: s1 [file s1]

Supplementary Table S1. List of primers used for amplifications and sequencing of *Choclo orthohantavirus* S segment and *Cytb* gene of *Oligoryzomys costaricensis*.

| Name                     | Sequence                                    | Design by:             | Purpose         |
|--------------------------|---------------------------------------------|------------------------|-----------------|
| <b>Cytochrome B gene</b> |                                             |                        |                 |
| MVZ05                    | 5'-CGA AGC TTG ATA TGA AAA ACC ATC GTT G-3' | Irwin et al. 1991      | PCR, sequencing |
| MVZ14                    | 5'-GGT CTT CAT CTY HGG YTT ACA AGA C-3'     | Smith and Patton, 1993 | PCR, Sequencing |
| MVZ16                    | 5'-AAATAGGAARTATCAYTCTGGTTTTRAT-3'          | Smith and Patton, 1993 | Sequencing      |
| H15149                   | 5'-AAACTGCAGCCCCTCAGAATGATATTTGTCCTCA-3'    | Kocher et al. 1989     | Sequencing      |
| L14734                   | 5'-AAA AAC CAT CGT CCT TTA TAG G-3'         | Irwin et al. 1991      | Sequencing      |
| L15513                   | 5'-CTA GGA GAC CCT GAC AAT CTA-3'           | Irwin et al. 1991      | Sequencing      |
| UNFOR403                 | 5'-TGA GGA CAA ATA TCA TTC TGA GG-3'        | Kent and Norris, 2005  | Sequencing      |
| UNREV1025                | 5'-GGT TGT CCT CCA ATT CAT GTT A-3'         | Kent and Norris, 2005  | Sequencing      |

Irwin, D M et al. "Evolution of the cytochrome b gene of mammals." *Journal of molecular evolution* vol. 32,2 (1991): 128-44. doi:10.1007/BF02515385

Smith, M F, and J L Patton. "Variation in mitochondrial cytochrome b sequence in natural populations of South American akodontine rodents (Muridae: Sigmodontinae)." *Molecular biology and evolution* vol. 8,1 (1991): 85-103. doi:10.1093/oxfordjournals.molbev.a040638

Kocher, T D et al. "Dynamics of mitochondrial DNA evolution in animals: amplification and sequencing with conserved primers." *Proceedings of the National Academy of Sciences of the United States of America* vol. 86,16 (1989): 6196-200. doi:10.1073/pnas.86.16.6196

Kent, Rebekah J, and Douglas E Norris. "Identification of mammalian blood meals in mosquitoes by a multiplexed polymerase chain reaction targeting cytochrome B." *The American journal of tropical medicine and hygiene* vol. 73,2 (2005): 336-42.
